# Supplementary material for: Cineantropometría: condición física : estilo de vida de los escolares aragoneses : (7 a 12 años)
Source: Hindawi journal article supplement (doi:10.1155/2016/8421597), 2004-01-01
Supplement: f1 [file 8421597.f1.pdf]

## Supplementary Material

In the Supplementary Material pictures of SDS-PAGE (protein purification) and Western Blot analysis of the recombinantly expressed SrTrx-lp and TsTrx-lp are provided (Supplementary Figure 1).

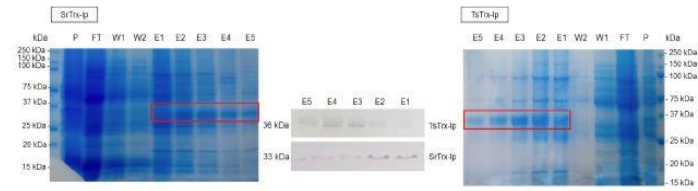

**SUPPLEMENTARY FIGURE 1:** Coomassie-stained SDS-PAGE of purification steps of recombinant SrTrx-lp (left) and TsTrx-lp (right) as well as Western Blot analysis (middle) of both eluted proteins. Elutions (E1-E5) were distinct lines at approximately 33 kDa (SrTrx-lp) and 36 kDa (TsTrx-lp). P: pellet; FT: flow through; W1: wash step 1; W2: wash step 2.
